# Supplementary figures and images for: Further Evaluation of Enterohemorrhagic Escherichia coli Gold Nanoparticle Vaccines Utilizing Citrobacter rodentium as the Model Organism
Source: MDPI journal article supplement (doi:10.3390/vaccines12050508), 2024-05-08

**Figure S1.** Shedding of DBS770 and DBS771 in infected animals at 2, 4, 6, and 8 dpi.

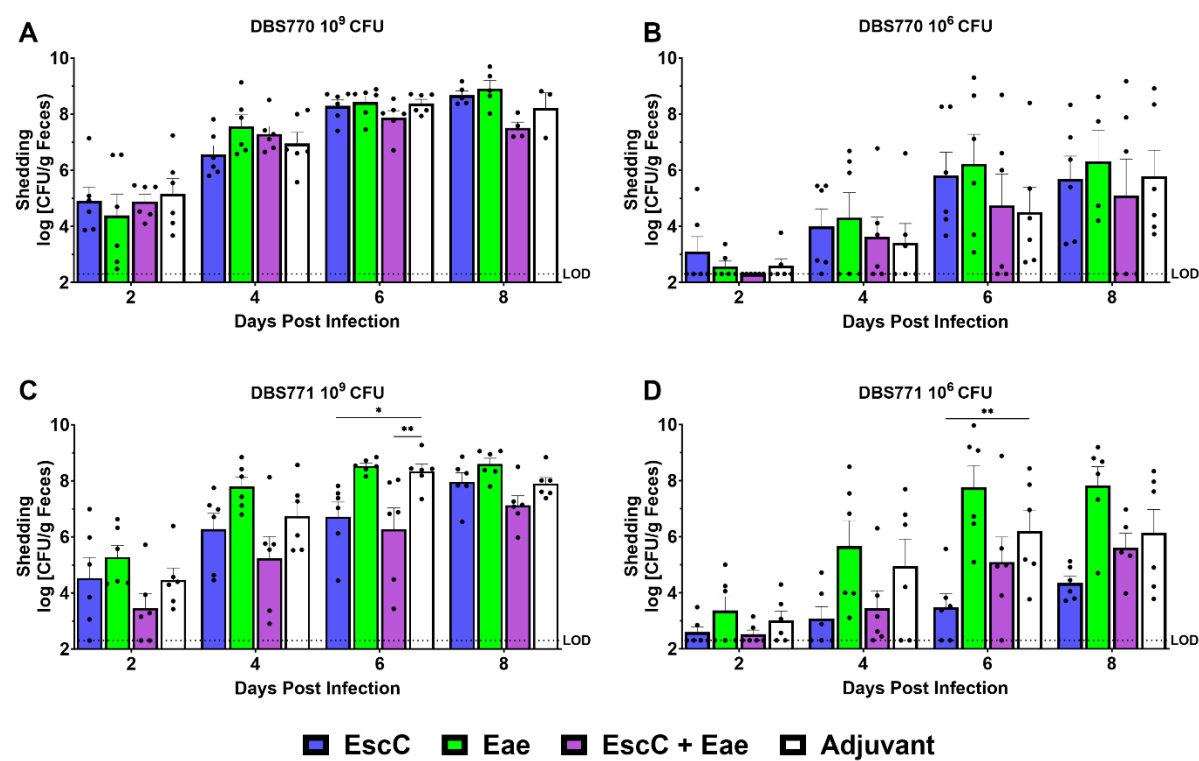

Supplement: s1 [file s1]
